# Supplementary material for: Genetically Low Antioxidant Protection and Risk of Cardiovascular Disease and Heart Failure in Diabetic Subjects
Source: PubMed Central journal article supplement (PMC4703764; doi:10.1016/j.ebiom.2015.11.026), 2015-11-14
Supplement: mmc1.pdf [file mmc1.pdf]

**Cardiovascular disease**

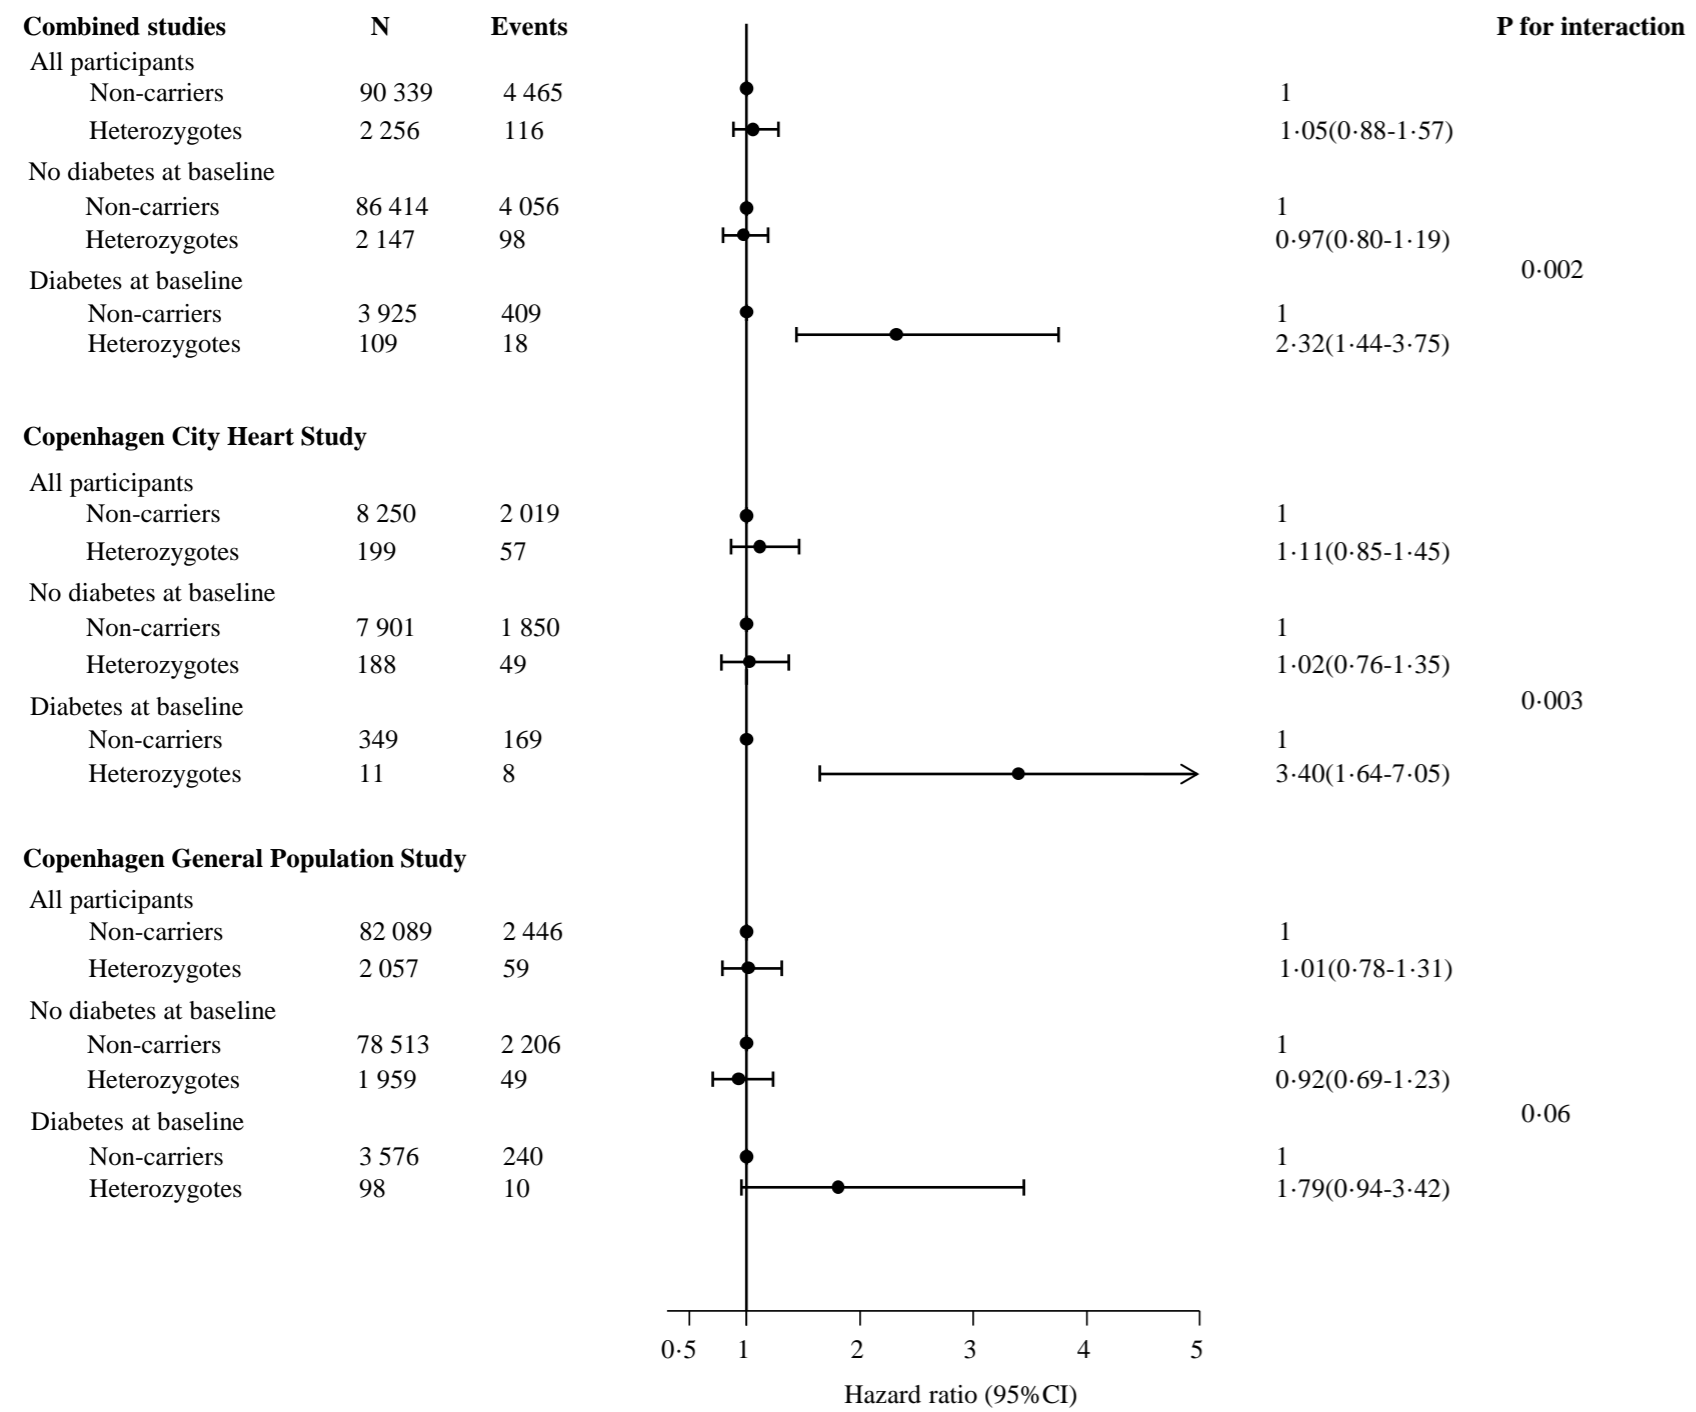

**Heart failure**

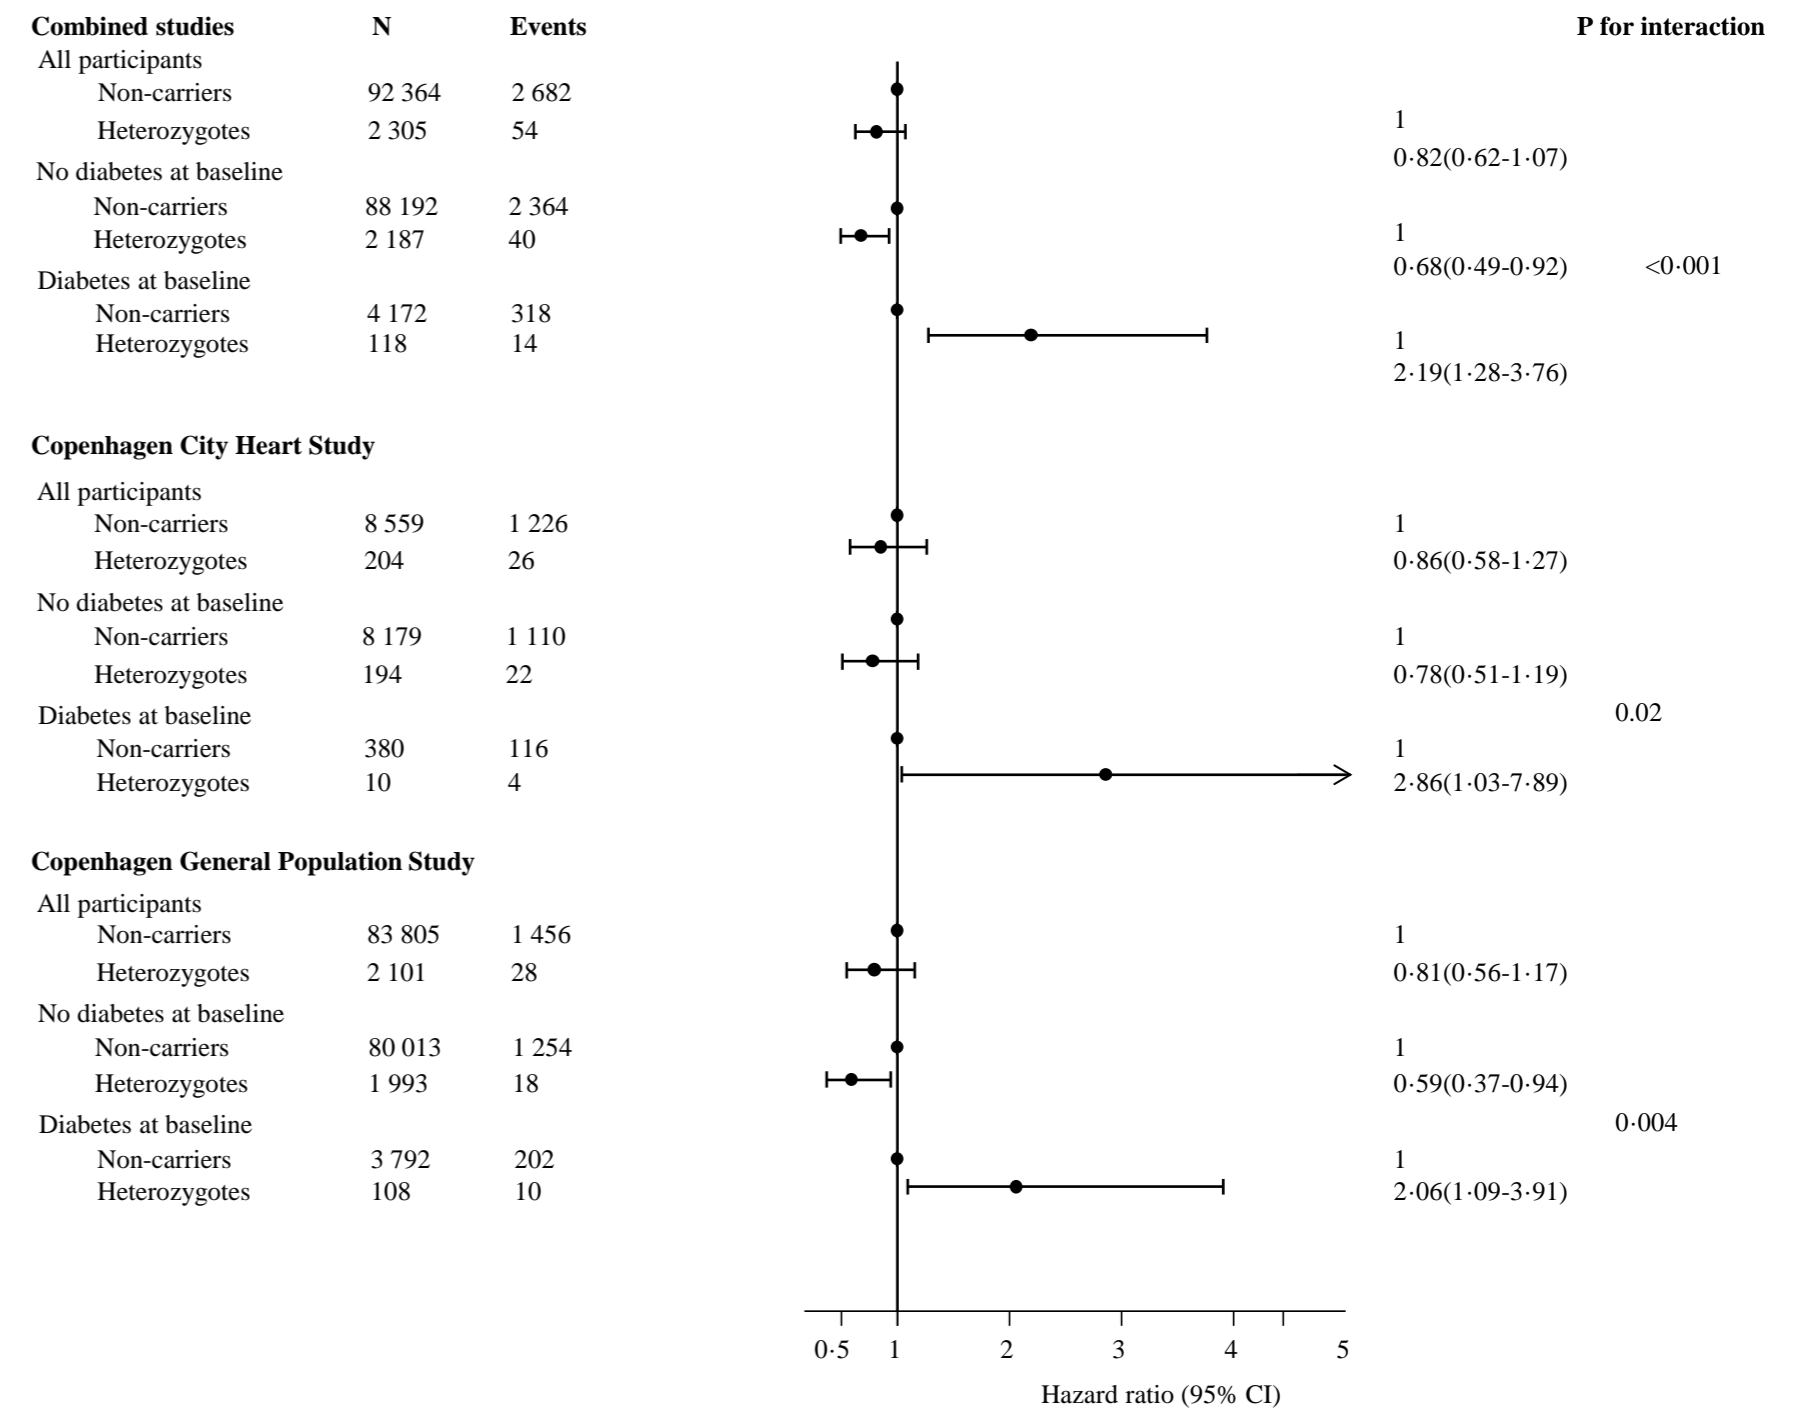

**Supplemental Figure 1. SOD3 R213G genotype and risk of cardiovascular disease and heart failure in the combined studies and in the two studies separately, stratified by diabetes status.** 3 262 individuals had experienced a cardiovascular event and 1188 individuals had experienced heart failure prior to examination and were not included in the analyses. Baseline diabetes: self-reported diabetes, hospital diagnosis of diabetes prior to examination, non-fasting plasma glucose >11mmol/L at examination, and/or use of antidiabetic medication. All estimates were adjusted for age; the combined studies were also adjusted for study. Cardiovascular disease was the composite endpoint of cardiovascular death, myocardial infarction, and ischemic stroke. CI: confidence interval.
