# Supplementary material for: Genetically Low Antioxidant Protection and Risk of Cardiovascular Disease and Heart Failure in Diabetic Subjects
Source: PubMed Central journal article supplement (PMC4703764; doi:10.1016/j.ebiom.2015.11.026), 2015-11-14
Supplement: mmc2.pdf [file mmc2.pdf]

**Cardiovascular disease**

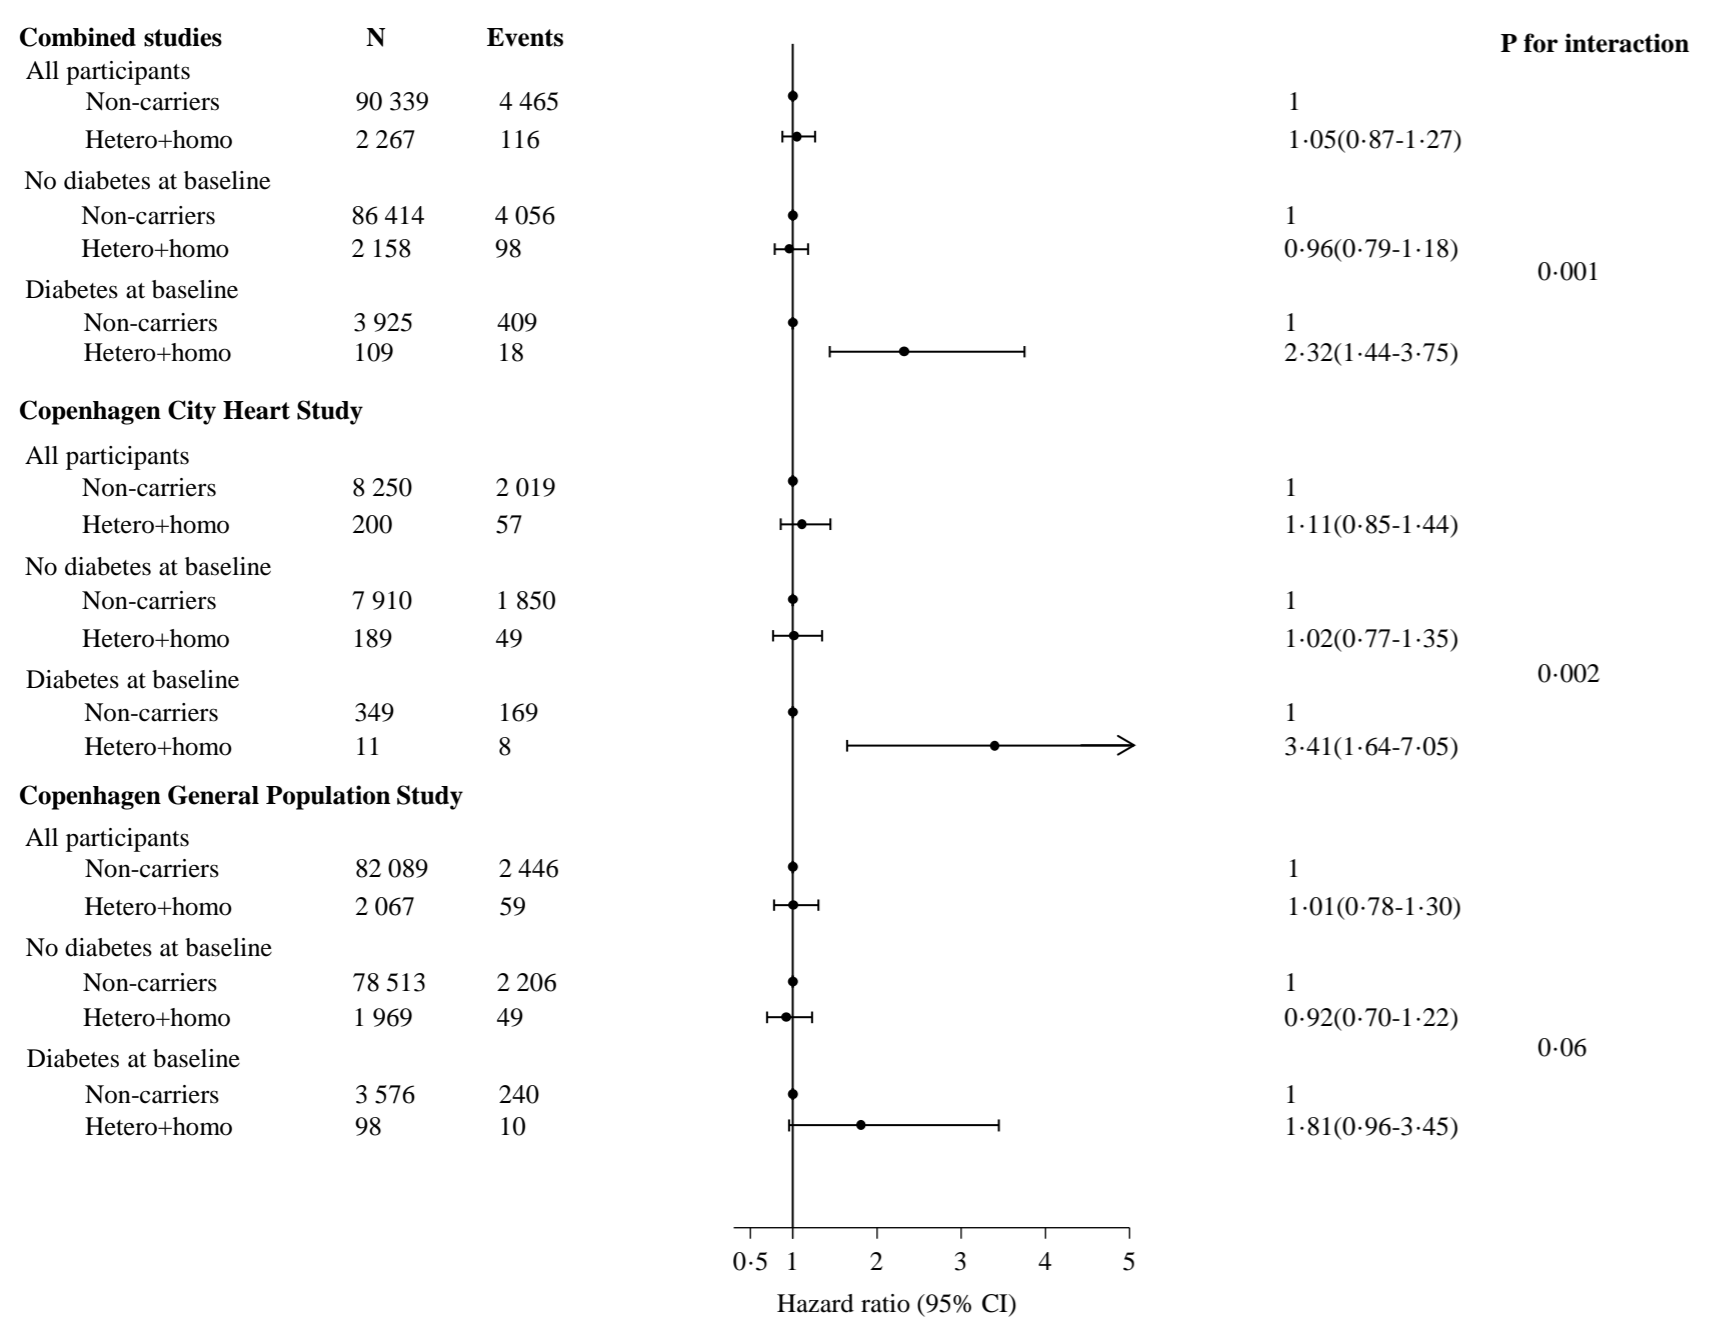

**Heart failure**

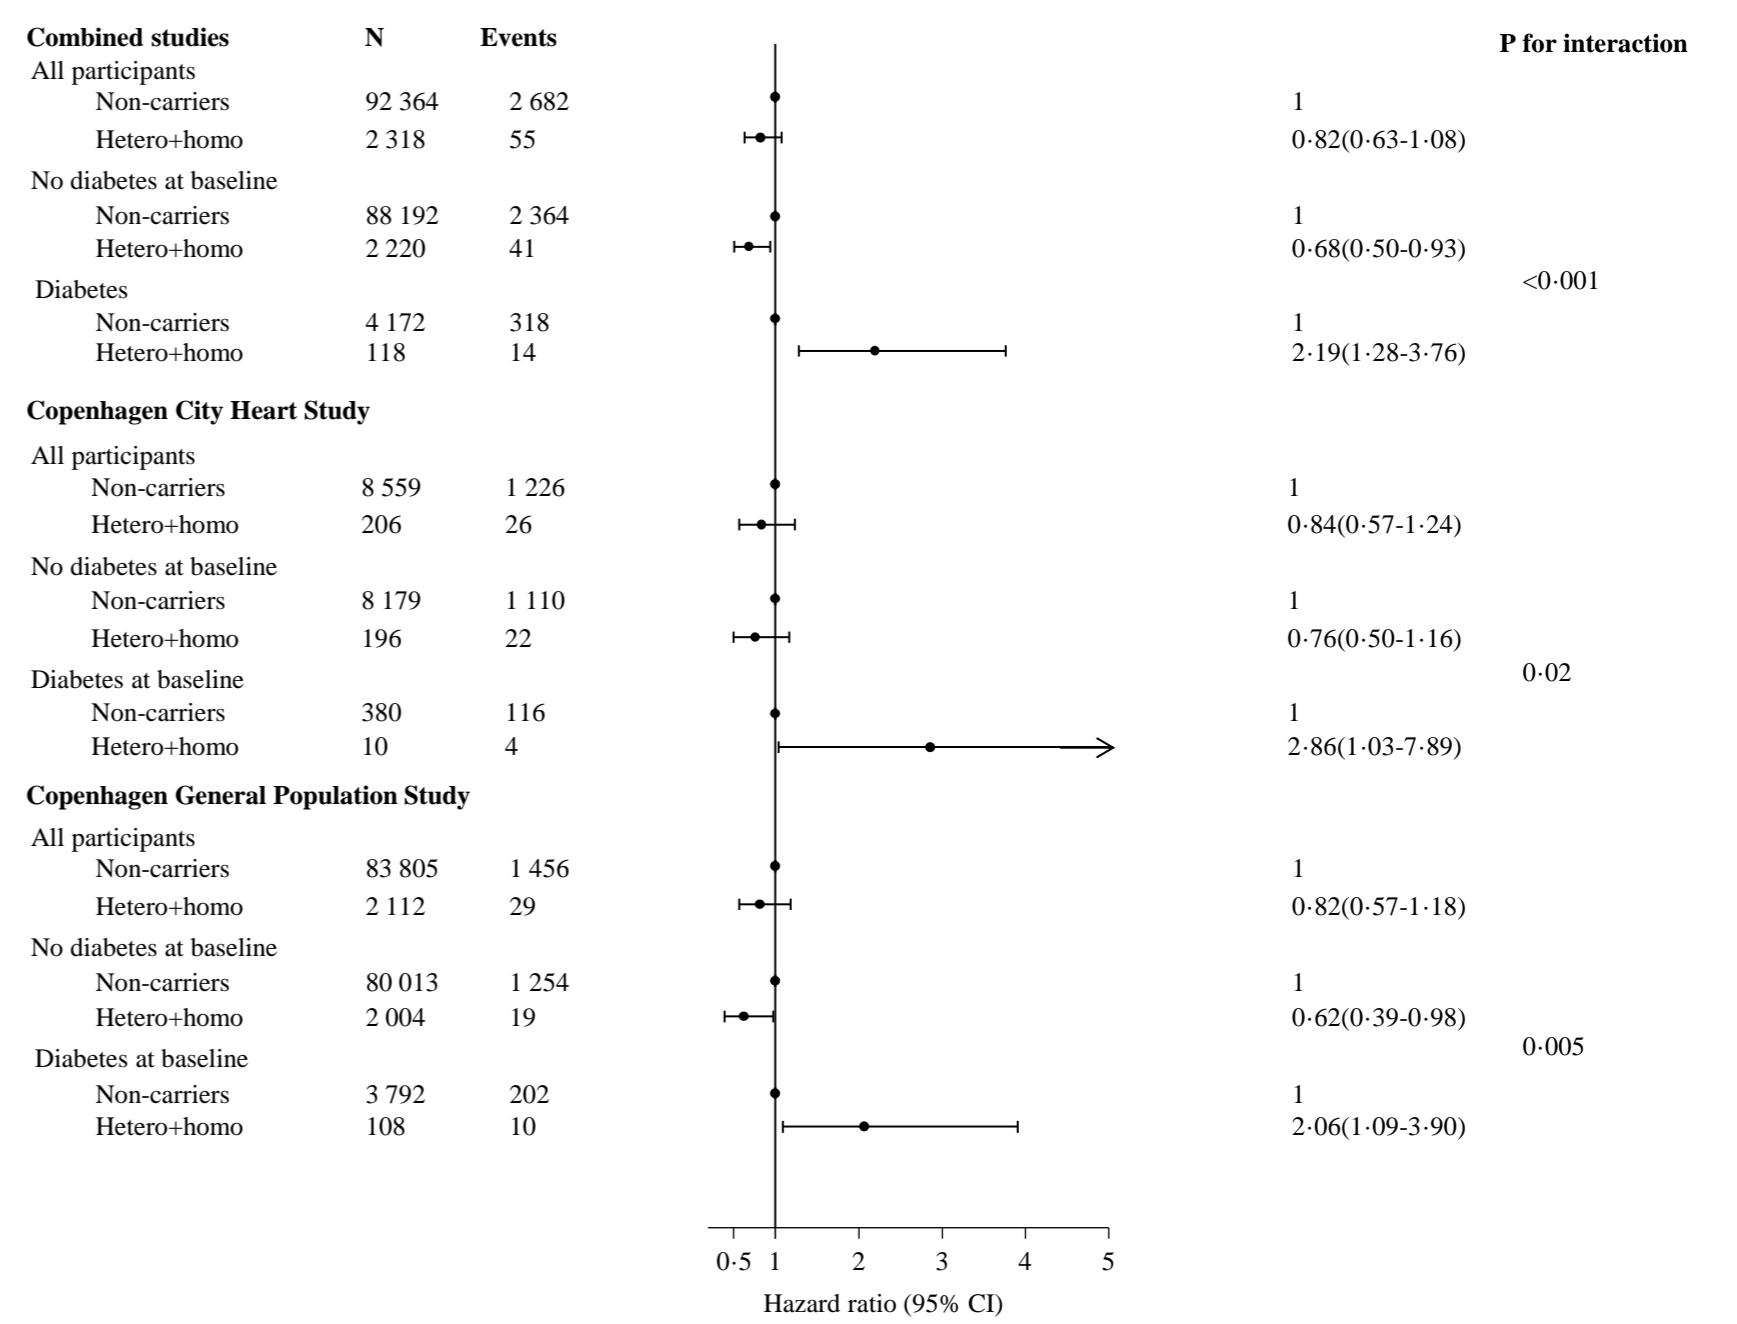

**Supplemental Figure 2. SOD3 R213G genotype and risk of cardiovascular disease and heart failure, stratified by baseline diabetes status.** Hetero+homo were R213G heterozygotes and homozygotes combined. Baseline diabetes: self-reported diabetes, hospital diagnosis of diabetes prior to examination, non-fasting plasma glucose >11mmol/L at examination, and/or use of antidiabetic medication. All estimates were adjusted for age; the combined studies were also adjusted for study. Cardiovascular disease was the composite endpoint of cardiovascular death, myocardial infarction, and ischemic stroke. CI: confidence interval.
